# Supplementary material
Source: Research Square preprint supplement (doi:10.21203/rs.3.rs-9390708/v1)
Supplement: Supplementary file 1 [file 799878208954d555736ccd56.docx]

**Assessment of cation levels in drinking water and wastewater: implications for water quality and regulatory compliance**

Ryan G.M.F. da Silva, Micherlane M. da Silva, Krissia V.N. Moraes, Elvis J. De França, Mario T. Kato, Maria J.F. Gomes, Iago J.S. da Silva*

**Supplementary Material**

**Figure S1 -** Plots of the residues generated by calibration models of the low concentration curve**:** a) Li+; b) Na+; c) NH4+; d) K+; e) Mg2+; and f) Ca2+.


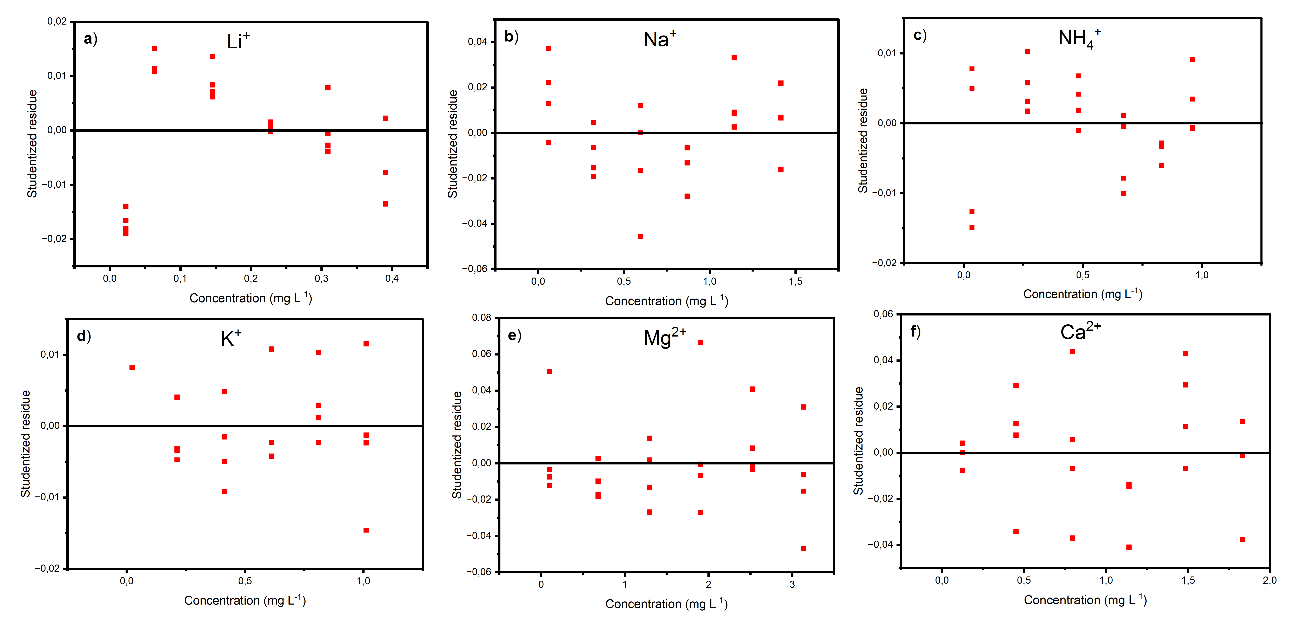


**Figure S2 -** Plots of the residues generated by the calibration models of the high concentration curve:a) Li+; b) Na+; c) NH4+; d) K+; e) Mg2+; and f) Ca2+.


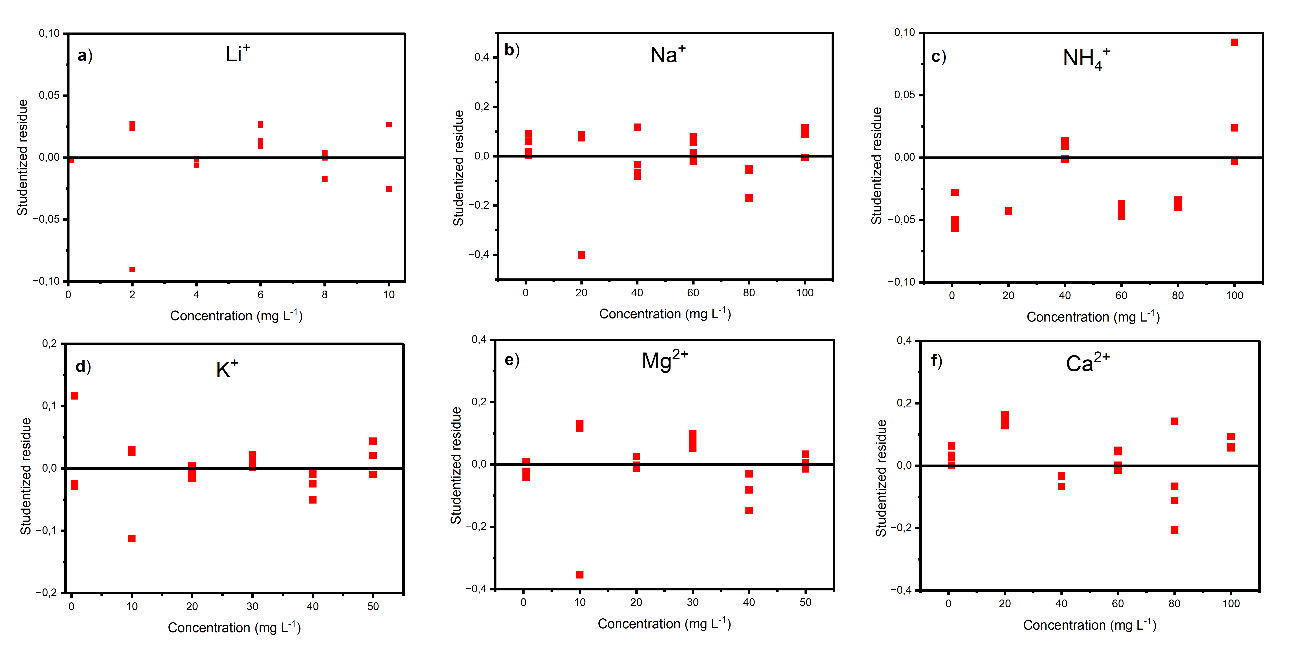


**Figure S3 -** Plots of PCA scores (top) and loadings (bottom) based on the multicationic composition of all water samples analyzed: tap water (royal blue), artesian well water (red), natural mineral water (green), carbonated mineral water (pool blue), and drinking fountain water (brown). PC – Principal Component.


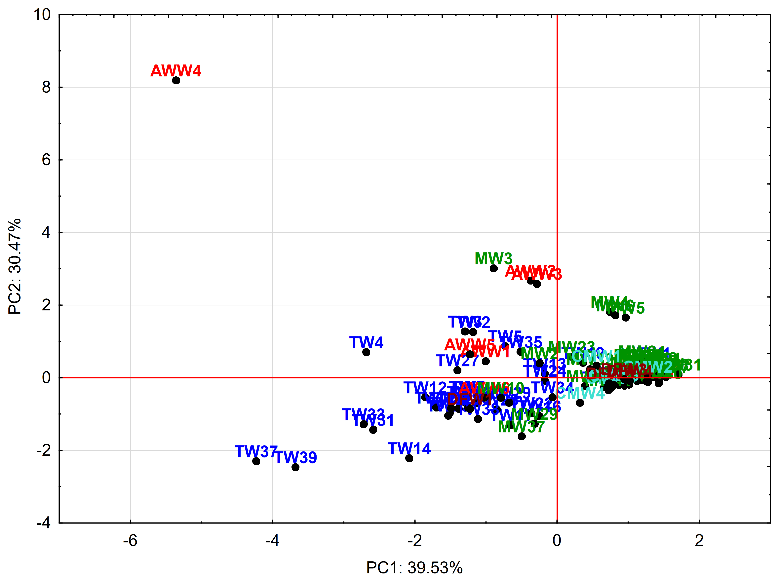


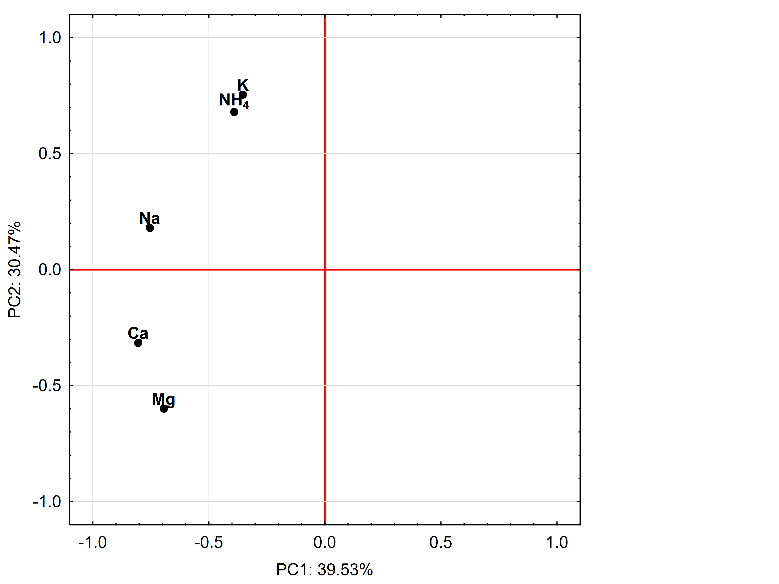


**Figure S4 –** Plots of scores (top) and loadings (bottom) of PCA based on the multicationic composition of all analyzed wastewater samples: Mangueira WWTP (royal blue), Peixinhos WWTP (red), and Cabanga WWTP (green). PC – Principal Component.


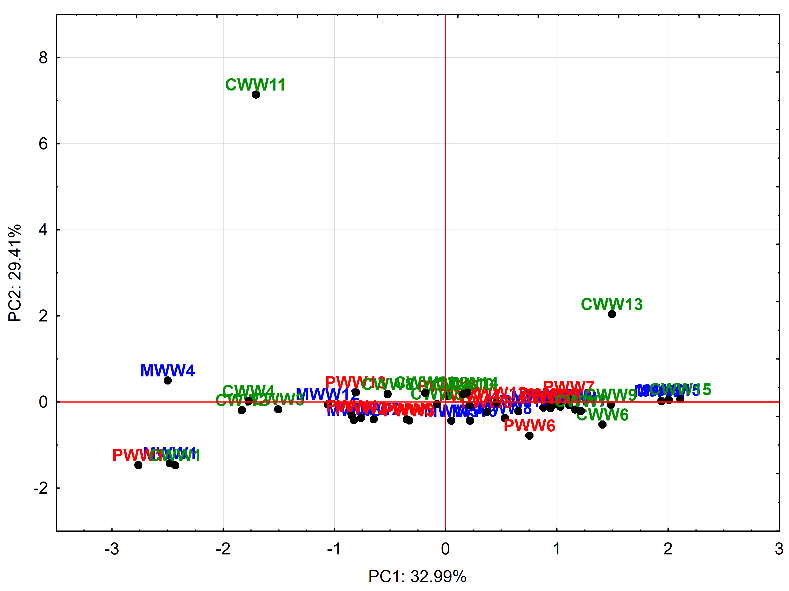


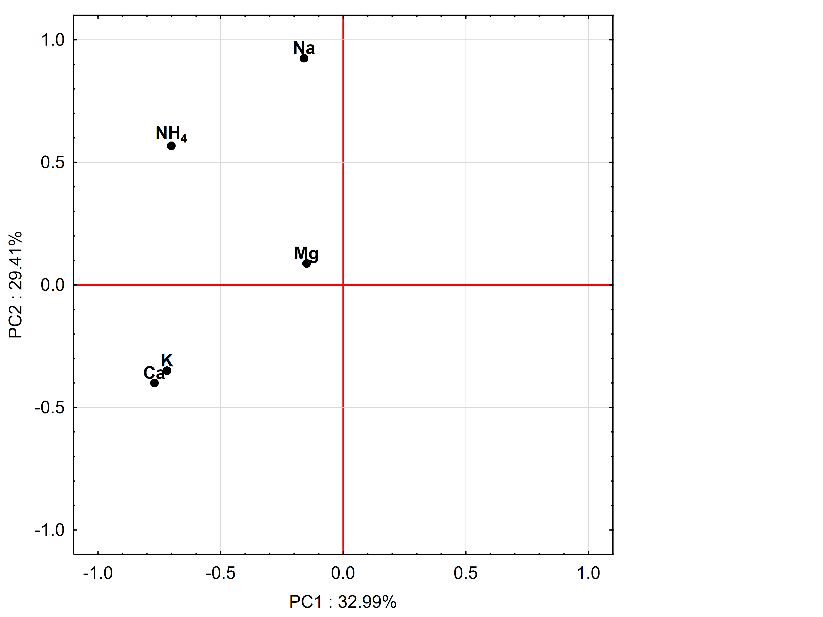


**Table S1 –** Analysis of variance for fitting the linear model of the six cations to the low concentration curve.

| Cation | Source  of variation | Quadratic  sum | Degrees of freedom | Quadratic  mean | | | Fcalculated | Ftabelated |
| --- | --- | --- | --- | --- | --- | --- | --- | --- |
| Li+ | Regression | 0.37 | 1 | 0.37 | | | 3175.00 | 4.32 |
|  | Residuals | 0.0024 | 21 | 0.00012 | | |  |  |
|  | Lack of fit | 0.0022 | 4 | 0.00054 | | | 33.59 | 2.96 |
|  | Pure error | 0.00027 | 17 | 0.000016 | | |  | |
|  | Total | 0.37 | 22 |  | | | | |
| Na+ | Regression | 5.05 | 1 | | 5.05 | 12762.00 | | 4.32 |
|  | Residuals | 0.0083 | 21 | | 0.00040 |  | |  |
|  | Lack of fit | 0.0033 | 4 | | 0.00082 | 2.80 | | 2.96 |
|  | Pure error | 0.0050 | 17 | | 0.00029 |  | |  |
|  | Total | 5.05 | 22 | |  |  | |  |
| NH4+ | Regression | 2.36 | 2 | | 1.18 | 30956.63 | | 3.49 |
|  | Residuals | 0.0010 | 20 | | 0.000050 |  | |  |
|  | Lack of fit | 0.00035 | 3 | | 0.00011 | 3.09 | | 2.30 |
|  | Pure error | 0.00065 | 17 | | 0.000038 |  | |  |
|  | Total | 2.54 | 22 | |  |  | |  |
| K+ | Regression | 2.72 | 1 | | 2.72 | 52277.43 | | 4.32 |
|  | Residuals | 0.00109 | 21 | | 0.0011 |  | |  |
|  | Lack of fit | 0.00020 | 4 | | 0.00020 | 0.93 | | 2.96 |
|  | Pure error | 0.00090 | 17 | | 0.00090 |  | |  |
|  | Total | 2.73 | 22 | |  |  | |  |
| Mg2+ | Regression | 25.97 | 1 | | 25.97 | 38161.84 | | 4.30 |
|  | Residuals | 0.015 | 22 | | 0.00068 |  | |  |
|  | Lack of fit | 0.0019 | 4 | | 0.00048 | 0.66 | | 2.77 |
|  | Pure error | 0.0131 | 18 | | 0.00073 |  | |  |
|  | Total | 25.98 | 23 | |  |  | |  |
| Ca2+ | Regression | 6.71 | 1 | | 6.71 | 10412.92 | | 4.38 |
|  | Residuals | 0.012 | 19 | | 0.00064 |  | |  |
|  | Lack of fit | 0.0034 | 4 | | 0.00084 | 1.42 | | 3.06 |
|  | Pure error | 0.0089 | 15 | | 0.00059 |  | |  |
|  | Total | 6.73 | 20 | |  |  | |  |

**Table S2 –** Analysis of variance for fitting the linear model of the six cations to the high concentration curve.

| Cation | Source  of variation | Quadratic  sum | Degrees of freedom | Quadratic  mean | | | Fcalculated | Ftabelated |
| --- | --- | --- | --- | --- | --- | --- | --- | --- |
| Li+ | Regression | 30.72 | 1 | 30.72 | | | 42792.47 | 4.35 |
|  | Residuals | 0.014 | 20 | 0.00070 | | |  |  |
|  | Lack of fit | 0.0019 | 4 | 0.00050 | | | 0.60 | 3.01 |
|  | Pure error | 0.013 | 16 | 0.00080 | | |  | |
|  | Total | 30.73 | 21 |  | | | | |
| Na+ | Regression | 530.43 | 1 | | 530.43 | 37439.96 | | 4.35 |
|  | Residuals | 0.28 | 20 | | 0.014 |  | |  |
|  | Lack of fit | 0.057 | 4 | | 0.014 | 1.02 | | 3.01 |
|  | Pure error | 0.23 | 16 | | 0.014 |  | |  |
|  | Total | 530.71 | 21 | |  |  | |  |
| NH4+ | Regression | 30.44 | 2 | | 15.22 | 3763.28 | | 3.52 |
|  | Residuals | 0.077 | 19 | | 0.0040 |  | |  |
|  | Lack of fit | 0.051 | 3 | | 0.0169 | 10.41 | | 3.24 |
|  | Pure error | 0.026 | 16 | | 0.0016 |  | |  |
|  | Total | 30.52 | 21 | |  |  | |  |
| K+ | Regression | 56.74 | 1 | | 56.74 | 30172.74 | | 4.35 |
|  | Residuals | 0.038 | 20 | | 0.0019 |  | |  |
|  | Lack of fit | 0.0048 | 4 | | 0.0012 | 0.58 | | 3.01 |
|  | Pure error | 0.033 | 16 | | 0.0021 |  | |  |
|  | Total | 56.78 | 21 | |  |  | |  |
| Mg2+ | Regression | 525.35 | 1 | | 525.35 | 45963.68 | | 4.35 |
|  | Residuals | 0.23 | 20 | | 0.011 |  | |  |
|  | Lack of fit | 0.047 | 4 | | 0.012 | 1.02 | | 3.01 |
|  | Pure error | 0.18 | 16 | | 0.011 |  | |  |
|  | Total | 525.58 | 21 | |  |  | |  |
| Ca2+ | Regression | 816.723 | 1 | | 816.72 | 46574.81 | | 4.32 |
|  | Residuals | 0.368 | 21 | | 0.018 |  | |  |
|  | Lack of fit | 0.042 | 4 | | 0.011 | 0.55 | | 2.96 |
|  | Pure error | 0.33 | 17 | | 0.019 |  | |  |
|  | Total | 817.09 | 22 | |  |  | |  |

**Table S3 –** Literature review on detection types and LOD/LOQ values for cation determination by ion chromatography in aqueous samples.

| **Sample** | **Detection** | **Determined ions** | | **Reference** |
| --- | --- | --- | --- | --- |
| **LOD (mg L-1)** | **LOQ**  **(mg L-1)** |
| Rain waters | Non-suppressed conductivity | Na+ (0.05), NH4+ (0.03), K+ (0.04), Mg2+ (0.02), and Ca2+ (0.05) | NI | Schumann and Ernst (1993) |
| Mineral waters | Suppressed conductivity | Na+ (10.0), K+ (0.30), Mg2+ (0.30), and Ca2+ (0.30) | NI | Gros and Gorenc (1997) |
| Oil field water | Non-suppressed conductivity | Na+ (2.00), K+ (3.00), Mg2+ (0.10), and Ca2+ (0.20) | NI | Liu *et al.* (1997) |
| Drinking water and acid rain water | Non-suppressed conductivity | Li+ (0.17), Na+ (0.28), NH4+ (0.24), K+ (0.61), Mg2+ (0.34), and Ca2+ (0.57) | NI | Ohta *et al.* (1999) |
| Brine | Suppressed conductivity | Li+, Na+, K+, Mg2+, Ca2+ (0.02 – 0.20), and NH4+ (0.10) | NI | Hodge *et al.* (2000) |
| River, lake, and tap waters | Suppressed conductivity | Na+ (0.10), NH4+ (0.09), K+ (0.20), Mg2+ (0.10), and Ca2+ (0.30) | NI | Karim *et al.* (2003) |
| UV + suppressed conductivity | Na+ (0.92), NH4+ (0.59), K+ (0.14), Mg2+ (0.14), and Ca2+ (0.40) | NI |
| River waters | Suppressed conductivity | Na+ (0.91), NH4+ (1.19), K+ (1.29), Mg2+ (0.81), and Ca2+ (1.13) | NI | Amin *et al.* (2006) |
| Eutrophic sea and fish otoliths | Suppressed conductivity | Li+ (0.0001), Na+ (0.05), NH4+ (0.04), K+ (0.02), Mg2+ (0.01), and Ca2+ (2.56) | NI | Marini *et al.* (2006) |
| River waters | Non-suppressed conductivity | Na+ (0.06), NH4+ (0.05), K+ (0.13), Mg2+ (0.15), and Ca2+ (0.38). | NI | Amin *et al.* (2008) |
| Sea and estuary water | Suppressed conductivity | Na+ (26.4), K+ (0.96), Mg2+ (3.15), and Ca2+ (1.00) | NI | Gros *et al.* (2008) |

**Tabela S3** (Continued)

NI - not informed.

| **Sample** | **Detection** | **Determined ions** | | **Referência** |
| --- | --- | --- | --- | --- |
| **LOD (mg L-1)** | **LOQ (mg L-1)** |
| Natural waters | Non-suppressed conductivity | Li+ (0.003), Na+ (0.02), NH4+ (0.01), K+ (0.01), Mg2+ (0.02), and Ca2+ (0.01) | Li+ (0.01), Na+ (0.06), NH4+ (0.03), K+ (0.03), Mg2+ (0.07), and Ca2+ (0.03) | Zachariadis *et al.* (2011) |
| Drinking water | Suppressed conductivity | Na+ (0.001), NH4+ (0.0004), K+ (0.002), Mg2+ (0.005), and Ca2+ (0.004) | NI | Dawood and Sanad (2014) |
| Pharmaceutical formula (lithium citrate) | Non-suppressed conductivity | Li+ (0.0012) | Li+ (0.004) | Patil and Rohrer (2015) |
| Sea water | Suppressed conductivity | Li+ (0.001), Na+ (0.004), NH4+ (0.005), K+ (0.01), Mg2+ (0.005), and Ca2+ (0.005) | NI | Basumallick and Rohrer (2016) |
| Chitooligosaccharides | Suppressed conductivity | Na+ (0.01), NH4+ (0.02), K+ (0.04), Mg2+ (0.05), and Ca2+ (0.02) | Na+ (0.03), NH4+ (0.06), K+ (0.14), Mg2+ (0.15), and Ca2+ (0.14) | Cao *et al.* (2017) |
| Parental nutrition solution | Suppressed conductivity | Na+ (0.001), K+ (0.01), Mg2+ (0.02), and Ca2+ (0.02) | Na+ (0.003), K+ (0.03), Mg2+ (0.06), and Ca2+ (0.06) | Wen *et al.* (2022) |
| Non-suppressed conductivity | Na+ (0.10), K+ (0.30), Mg2+ (0.20), and Ca2+ (0.30) | Na+ (0.20), K+ (1.00), Mg2+ (0.50), and Ca2+ (1.00) |
| Tap water, mineral water, drinking fountain water, well water, and wastewater | Suppressed conductivity | Li+ (0.01), Na+ (0.26), NH4+ (0.01), K+ (0.14), Mg2+ (0.08), and Ca2+ (1.44) | Li+ (0.04), Na+ (0.85), NH4+ (0.01), K+ (0.48), Mg2+ (0.27), and Ca2+ (4.73) | This work |

**Table S4 –** Literature review on cation determination by ion chromatography in aqueous samples, including analytes, chromatographic characteristics, and method performance.

| Sample | Determined parameter | Chromatographic parameters | Analysis time (min) | r2 | LOD  (mg L-1) | LOQ  (mg L-1) | RSD (%) | Reference |
| --- | --- | --- | --- | --- | --- | --- | --- | --- |
| Airborne particles and rain water | Ca2+, K+, Mg2+, Na+, and NH4+ | **Eluent:** 3.0 mmol L-1 HNO3 and 0.1 mmol L-1 EDTA; **Flow-rate:** 1.0 mL min-1. | 14 | NI | 0.02 – 0.05 | NI | NI | Schumann and Ernst (1993) |
| Rain and river water | Ca2+, K+, Mg2+, Na+, and NH4+ | **Eluent:** 2 mmol L-1 HNO3 and 2 mmol L-1 15-crown-5. **Flow-rate:** 1 mL min-1; **Volume:** 20 μL. | 20 | > 0.99 | 0.17 – 0.61 | NI | NI | Ohta *et al.* (1999) |
| Drinking and domestic Waters | Ca2+, K+, Li+, Mg2+, Na+, and NH4+ | **Eluent:** 26 mmol L-1 MSA; **Flow-rate:** 1.5 mL min-1; **Volume:** 25 μL. | 30 | 0.9993 – 0.9999 | 0.19 – 2.64 | NI | 0.09 – 0.99 | Thomas *et al.* (2002) |
| From river, pond, and tap water | Ca2+, K+, Mg2+, Na+, and NH4+ | **Eluent:** 1.0 mmol L-1 H2SO4 with aminoacid as the aditive. **Flow-rate:** 1 mL min-1; **Volume:** 20 μL. | 20 | NI | 0.09 – 0.3 | NI | 0.5 – 12.9 | Karim *et al.* (2003) |
| River water | Ca2+, K+, Mg2+, Na+, and NH4+ | **Eluent:** 2.4 mmol L-1 5-sulfosalicylic acid.  **Flow-rate:** 0.5 mL min-1; **Volume:** 20 μL. | 10 | 0.9913 - 0.9982 | 0.91 – 1.29 | NI | 1.13 – 2.91 | Amin *et al.* (2006) |
| River water | Ca2+, K+, Mg2+, Na+, and NH4+ | **Eluent:** 0.5 mmol L-1 trimellitic acid; **Flow-rate:** 0.7 mL min-1; **Volume:** 20 μL. | 30 | 0.9992 - 0.9998 | 0.05 – 0.38 | NI | 1.29 - 2.01 | Amin *et al.* (2008) |

**Table S4** (Continued)

| Sample | Determined parameter | Chromatographic parameters | Analysis time (min) | r2 | LOD  (mg L-1) | LOQ  (mg L-1) | RSD (%) | Reference |
| --- | --- | --- | --- | --- | --- | --- | --- | --- |
| Natural waters | Ca2+, K+, Li+, Mg2+, Na+, and NH4+ | **Eluent:** 5 mmol L-1 tartaric acid, 1 mmol L-1 DPA and 24 mmol L-1 boric acid; **Flow-rate:** 1.2 mL min-1; **Volume:** 20 μL. | 18 | 0.983 - 0.999 | 0.003 – 0.02 | 0.01 – 0.07 | 1.1 – 5.4 | Zachariadis *et al.* (2011) |
| Drinking water | Ca2+, K+, Mg2+, Na+, and NH4+ | **Eluent:** 42 mmol L-1 MSA; **Flow-rate:** 1.0 mL min-1; **Volume:** 25 µL. | 20 | 0.9941 - 0.9982 | 0.0004 – 0.005 | NI | 1.10 – 2.82 | Dawood and Sanad (2014) |
| Lithium citrate | Li+ | **Eluent:** 8 - 67 mmol L-1 MSA; **Flow-rate:** 0.4 mL min-1; **Volume:** 10 µL. | 20 | 0.9999 | 0.001 | 0,004 | 0.01 – 0.35 | Patil and Rohrer (2015) |
| Sea water | Ca2+, K+, Li+, Mg2+, Na+, and NH4+ | **Eluent:** 20 mmol L-1 MSA; **Flow-rate:** 0.5 mL min-1; **Volume:** 10 10 µL. | 15 | 0.9997 - 0.9999 | 0.001 – 0.01 | NI | 0.01 - 0.97 | Basumallick and Rohrer (2016) |
| Chitooligosaccharides | Ca2+, K+, Na+, Mg2+, and NH4+ | **Eluent:** 20 mmol L-1 MSA; **Flow-rate:** 1.0 mL min-1; **Volume:** 25 µL. | 15 | 0.9960 - 0.9999 | 0.01 – 0.05 | 0.03 – 0.15 | 0.06 - 6.40 | Cao *et al.* (2017) |
| Parenteral nutrition solution | Ca2+, K+, Mg2+, and Na+ | **Eluent:** 30 mmol L-1 MSA; **Flow-rate:** 0.36 mL min-1. | 25 | 0.9997 - 0.9999 | 0.001 – 0.02 | 0.003 – 0.06 | 0.2 – 0.9 | Wen *et al.* (2022) |

**Table S4** (Continued)

| Sample | Determined parameter | Chromatographic parameters | Analysis time (min) | r2 | LOD  (mg L-1) | LOQ  (mg L-1) | RSD (%) | Reference |
| --- | --- | --- | --- | --- | --- | --- | --- | --- |
| Oral pharmaceutical dosage forms | K+, Mg2+,and Na+ | **Eluent:** 20 mmol L-1 MSA; **Flow-rate:** 1.2 mL min-1; **Volume:** 20 µL. | 15 | 0.9990 | NI | NI | 0.10 – 0.21 | Yelampalli *et al.* (2023) |
| Saline water | Ca2+, K+, Mg2+, and Na+ | **Eluent:** 1.7 mmol L−1 HNO3 and 1.7 mmol L−1 PDA; **Flow-rate:** 0.9 mL min−1. | 38 | > 0.995 | NI | 0.08 – 0.15 | 0.02 – 0.51 | Tran *et al.* (2024) |
| Bottled water | Ca2+, K+, Mg2+, and Na+ | **Eluent:** 30 mmol L−1 MSA; **Flow-rate:** 1.0 mL min−1; **Volume:** 5000 μL. | 30 | 0.999 | NI | NI | 0.16 – 3.38 | Tudjarova *et al.* (2025) |
| Tap water, mineral water, drinking fountain water, wellwater, and wastewater | Ca2+, K+, Li+, Na+, Mg2+, and NH4+ | **Eluent:** 11 mmol L-1 H2SO4; **Flow rate:** 0.375 mL min-1; **Volume:** 5 μL. | 11 | 0.9975 – 0.9995 | 0.01 – 1.44 | 0.01 – 4.73 | 1.1 – 9.9 | This work |

MSA - Methanesulfonic acid; DPA - Dipicolinic acid; LOD - Limit of Detection; LOQ - Limit of Quantitation; NI - not informed; RSD - Relative Standard Deviation.

**References used only in Supplementary Material**

Basumallick, L., & Rohrer, J. (2016). *Monitoring inorganic anions and cations during desalination* (Application Note 260). Thermo Fisher Scientific.

Gros, N., & Gorenc, B. (1997). Performance of ion chromatography in the determination of anions and cations in various natural waters with elevated mineralization. *Journal of Chromatography A, 770*, 119–124. [https://doi.org/10.1016/S0021-9673(97)00060-5](https://doi.org/10.1016/S0021-9673(97)00060-5" \t "_new)

Hodge, E. M., Martinez, P., & Sweetin, D. (2000). Determination of inorganic cations in brine solutions by ion chromatography. *Journal of Chromatography A, 884*, 223–227. [https://doi.org/10.1016/S0021-9673(00)00203-X](https://doi.org/10.1016/S0021-9673(00)00203-X" \t "_new)

Liu, X., Jiang, S. X., Chen, L. R., Xu, Y. Q., & Ma, P. (1997). Determination of inorganic ions in oil field waters by single-column ion chromatography. *Journal of Chromatography A, 789*, 569–573. [https://doi.org/10.1016/S0021-9673(97)00788-7](https://doi.org/10.1016/S0021-9673(97)00788-7" \t "_new)

Marini, M., Campanelli, A., & Abballe, F. (2006). Measurement of alkaline and earthy ions in fish otolith and sea water using high-performance ion chromatography. *Marine Chemistry, 99*, 24–30. [https://doi.org/10.1016/j.marchem.2005.01.009](https://doi.org/10.1016/j.marchem.2005.01.009" \t "_new)

Patil, S. S., & Rohrer, J. (2015). *Ion chromatography assay for lithium in lithium citrate* (Application Note 1121). Thermo Fisher Scientific.

Tran, Q. N., Phan, P. T., Nguyen, H. D., Vo, N. N. T., Le, H. G. V., & Truong-Lam, H. S. (2024). Simultaneous determination of inorganic ions in saline water from the Mekong Delta using ion chromatography. *Water Science, 39*, 73–82. [https://doi.org/10.1080/23570008.2024.2447975](https://doi.org/10.1080/23570008.2024.2447975" \t "_new)

Yelampalli, S. R., Gandla, K., Reddy, K. T. K., Ibrahim, A. E., & El Deeb, S. (2023). Determination of sodium, potassium, and magnesium as sulfate salts in oral preparations using ion chromatography and conductivity detection. *Separations, 10*, 99. <https://doi.org/10.3390/separations10020099>
